# Supplementary material for: Loss of the RNA helicase SKIV2L2 impairs mitotic progression and replication-dependent histone mRNA turnover in murine cell lines
Source: PubMed Central journal article supplement — RNA. 2017 Jun;23(6):910–26. doi: 10.1261/rna.060640.117 (PMC5435864; doi:10.1261/rna.060640.117), 2017-06
Supplement: supp_060640.117_Supplemental_Table_S4.pdf [file supp_060640.117_Supplemental_Table_S4.pdf]

| Gene    | Imprinting        | log <sub>2</sub> fold change | chromosome location | q-value |
|---------|-------------------|------------------------------|---------------------|---------|
| Grb10   | Isoform Dependent | 1.43                         | chr11               | 0.0014  |
| Impact  | Paternal          | 0.420                        | chr18               | 0.0026  |
| Snrpn   | Paternal          | 0.409                        | chr7                | 0.035   |
| Lin28a  | Paternal          | 0.373                        | chr4                | 0.020   |
| Peg12   | Paternal          | -0.391                       | chr7                | 0.044   |
| Inpp5f  | Paternal          | -0.408                       | chr7                | 0.016   |
| Slc38a4 | Paternal          | -0.450                       | chr15               | 0.014   |
| H19     | Maternal          | -0.482                       | chr7                | 0.050   |
| Pigu    | Paternal          | -0.485                       | chr2                | 0.022   |
| Frat1   | Paternal          | -0.521                       | chr19               | 0.39    |
| Ppp1r9a | Maternal          | -0.544                       | chr6                | 0.0014  |
| Igf2    | Paternal          | -0.578                       | chr7                | 0.0055  |
| Ocr1    | Paternal          | -0.844                       | chrX                | 0.0014  |
| Gab1    | Paternal          | -0.909                       | chr8                | 0.049   |
| Plagl1  | Paternal          | -1.17                        | chr10               | 0.0014  |
| Zdbf2   | Paternal          | -1.38                        | chr1                | 0.039   |

**Supplemental Table S4: Imprinted genes changing expression with *Skiv2l2* knockdown in P19 cells.** RNAseq data was interrogated for imprinted genes changing expression, using gene list obtained from Gene Imprint: Imprinted Gene Database (<http://www.geneimprint.com/site/genes-by-species.Mus+musculus>). Log<sub>2</sub>foldchange= log<sub>2</sub>(Control levels/*Skiv2l2* knockdown levels) as determined through cuffdiff.
