# Supplementary material for: Loss of the RNA helicase SKIV2L2 impairs mitotic progression and replication-dependent histone mRNA turnover in murine cell lines
Source: PubMed Central journal article supplement — RNA. 2017 Jun;23(6):910–26. doi: 10.1261/rna.060640.117 (PMC5435864; doi:10.1261/rna.060640.117), 2017-06
Supplement: supp_060640.117_Supplemental_Table_S5.pdf [file supp_060640.117_Supplemental_Table_S5.pdf]

| <b>Histone</b> | <b>Gene Name</b> | <b>log<sub>2</sub>fold change</b> | <b>q-value</b> |
|----------------|------------------|-----------------------------------|----------------|
| H3             | Hist1h3e         | 3.422                             | 0.0015         |
| H2A            | H2afj            | 2.8614                            | 0.0015         |
| H4             | Hist1h4j         | 2.4992                            | 0.0055         |
| H2B            | Hist1h2bc        | 1.7225                            | 0.0015         |
| H4             | Hist1h4a         | 1.6044                            | 0.0015         |
| H2B            | Hist1h2bn        | 1.5449                            | 0.0015         |
| H2B            | Hist1h2bh        | 1.4328                            | 0.0015         |
| H2A            | Hist1h2an        | 1.3952                            | 0.0015         |
| H4             | Hist1h4f         | 1.3176                            | 0.0015         |
| H4             | Hist1h4k         | 1.3143                            | 0.0015         |
| H4             | Hist1h4d         | 1.3043                            | 0.0015         |
| H2B            | Hist1h2bk        | 1.2686                            | 0.0015         |
| H3             | Hist1h3i         | 1.1831                            | 0.0015         |
| H2B            | Hist1h2bg        | 1.1672                            | 0.0015         |
| H4             | Hist1h4i         | 1.1225                            | 0.0015         |
| H4             | Hist1h4b         | 1.1002                            | 0.0015         |
| H2A            | Hist2h2ac        | 1.0897                            | 0.0015         |
| H2B            | Hist1h2bl        | 1.0895                            | 0.0015         |
| H4             | Hist2h4          | 1.0518                            | 0.0015         |
| H4             | Hist1h4h         | 1.0499                            | 0.0015         |
| H2B            | Hist1h2bm        | 1.0281                            | 0.0015         |
| H2A            | Hist3h2a         | 0.9981                            | 0.0015         |
| H2A            | Hist1h2ah        | 0.9973                            | 0.0055         |
| H2B            | Hist1h2be        | 0.9929                            | 0.0015         |
| H3             | Hist1h3f         | 0.9824                            | 0.0015         |
| H2B            | Hist1h2bj        | 0.9806                            | 0.0015         |

|       |              |        |        |
|-------|--------------|--------|--------|
| H3    | Hist1h3a     | 0.9728 | 0.0015 |
| H3    | Hist1h3c     | 0.9416 | 0.0015 |
| H2A   | Hist1h2ak    | 0.9298 | 0.0015 |
| H4    | Hist4h4      | 0.916  | 0.0015 |
| H2B   | Hist1h2bf    | 0.8984 | 0.0015 |
| H3    | Hist2h3b     | 0.8816 | 0.0095 |
| H2B   | Hist3h2bb-ps | 0.8594 | 0.0015 |
| H4    | Hist1h4c     | 0.8594 | 0.0015 |
| H2A   | Hist1h2ai    | 0.8042 | 0.008  |
| H3    | Hist1h3g     | 0.7957 | 0.0015 |
| H3    | Hist1h3h     | 0.7068 | 0.0015 |
| H2B   | Hist1h2bp    | 0.6818 | 0.0015 |
| H2B   | Hist3h2ba    | 0.6661 | 0.0015 |
| H3    | Hist1h3d     | 0.5921 | 0.0015 |
| H2A   | Hist1h2ac    | 0.5881 | 0.02   |
| H3    | Hist1h3b     | 0.5487 | 0.0015 |
| H1    | Hist1h1b     | 0.5382 | 0.0015 |
| H1    | Hist1h1c     | 0.4263 | 0.0036 |
| H2B   | Hist2h2bb    | 0.4164 | 0.0055 |
| H1    | Hist1h1d     | 0.3362 | 0.0354 |
| H2A.X | H2afx        | -2.398 | 0.0015 |
| H2A.Z | H2afz        | -2.486 | 0.0015 |

**Supplemental Table S5: Histone genes changing expression with *Skiv2l2* knockdown in P19 cells.** RNAseq data was interrogated for histone genes changing expression.  $\text{Log}_2\text{foldchange} = \log_2(\text{Control levels}/\text{Skiv2l2 knockdown levels})$  as determined through cuffdiff.
